# Supplementary figures and images for: Chemical and cellular antioxidant activity of flavone extracts of Labisia pumila before and after in vitro gastrointestinal digestion
Source: Royal Society of Chemistry journal article supplement (doi:10.1039/c8ra00142a), 2018-01-01

**Supporting Information;**

**Figure S1.** The sample caption of *Labisia pumila*.

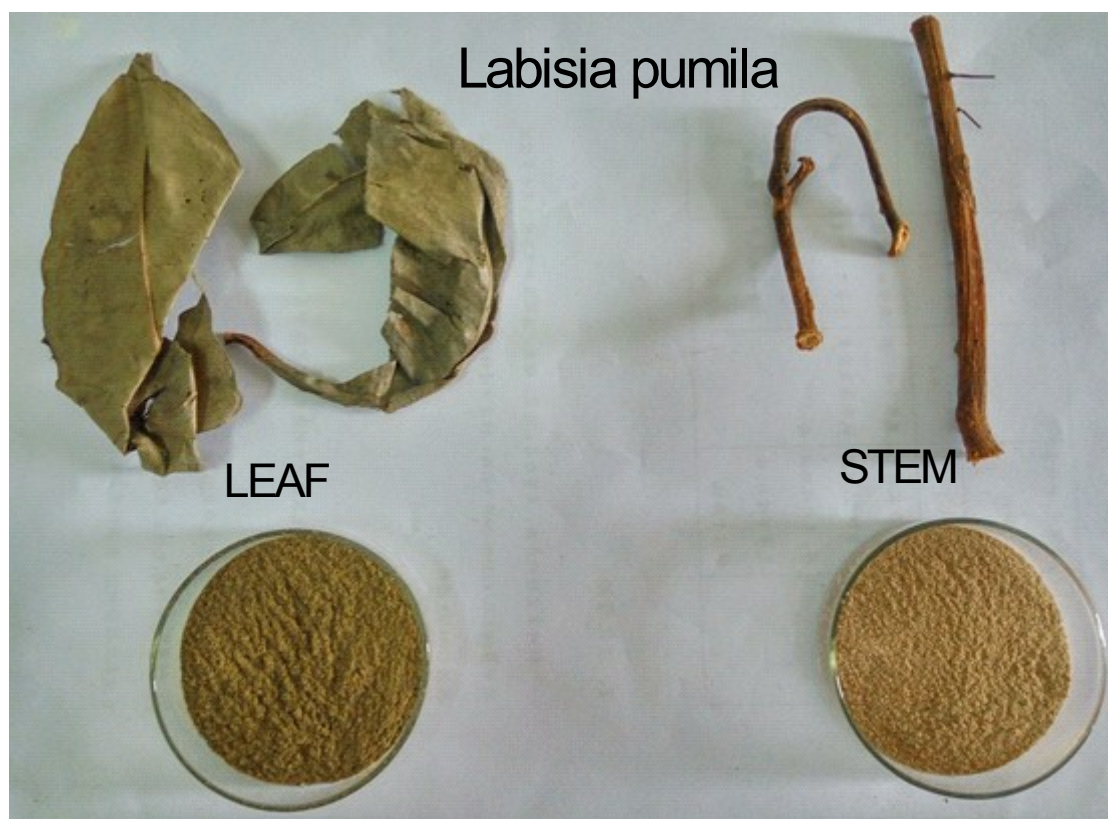

Supplement: c8ra00142a1.pdf [file c8ra00142a1.pdf]
